# Supplementary material
Source: publisher figshare collection journal article supplement (https://sage.figshare.com/ndownloader/files/12710393)
Supplement: Supplementary file 1 [file 12710393]

## Supplementary Material

### Supplementary Table 1

#### Characteristics of memory clinic subjects included and excluded in the study (n=1682)

| Variables                           | Included in study<br>(n=1271) | Excluded in<br>study(n=411) | <i>p-value*</i>  |
|-------------------------------------|-------------------------------|-----------------------------|------------------|
| Age (years), median (IQR)           | 74 (12)                       | 73 (20)                     | <b>0.012</b>     |
| Gender (female), n (%)              | 717 (56.4)                    | 226 (55)                    | 0.613            |
| Education, ( $\geq 6$ years), n (%) | 410 (34.3)                    | 165 (46.7)                  | <b>&lt;0.001</b> |
| MMSE, median (IQR)                  | 18 (11)                       | 20 (14)                     | <b>0.003</b>     |

Abbreviations: MMSE, Mini–Mental State Examination; IQR, interquartile range  
*p*-value < 0.05 was considered statistically significant

### Supplementary Table 2

#### Characteristics of memory clinic subjects with and without CT scan (n=1271)

| Variables                           | With CT scan<br>data (n=580) | Without CT<br>scan data<br>(n=691) | <i>p-value*</i> |
|-------------------------------------|------------------------------|------------------------------------|-----------------|
| Age (years), median (IQR)           | 75 (11)                      | 73 (12)                            | <b>0.020</b>    |
| Gender (female), n (%)              | 352 (60.7)                   | 365 (52.8)                         | <b>0.005</b>    |
| Education, ( $\geq 6$ years), n (%) | 167 (31.0)                   | 243 (37)                           | <b>0.030</b>    |
| MMSE, median (IQR)                  | 18 (9)                       | 17 (11)                            | 0.566           |
| Dementia, n (%)                     | 335 (57)                     | 410 (59.3)                         | 0.570           |

Abbreviations: MMSE, Mini–Mental State Examination; IQR, interquartile range  
*p*-value < 0.05 was considered statistically significant
